# Supplementary material for: BMSCs-derived exosomes inhibit macrophage/microglia pyroptosis by increasing autophagy through the miR-21a-5p/PELI1 axis in spinal cord injury
Source: publisher site journal article supplement (doi:10.18632/aging.205638), 2024-03-11
Supplement: Supplementary file [file aging-v16i6-205638-supplementary-material-SD1.pdf]

## SUPPLEMENTARY FIGURES

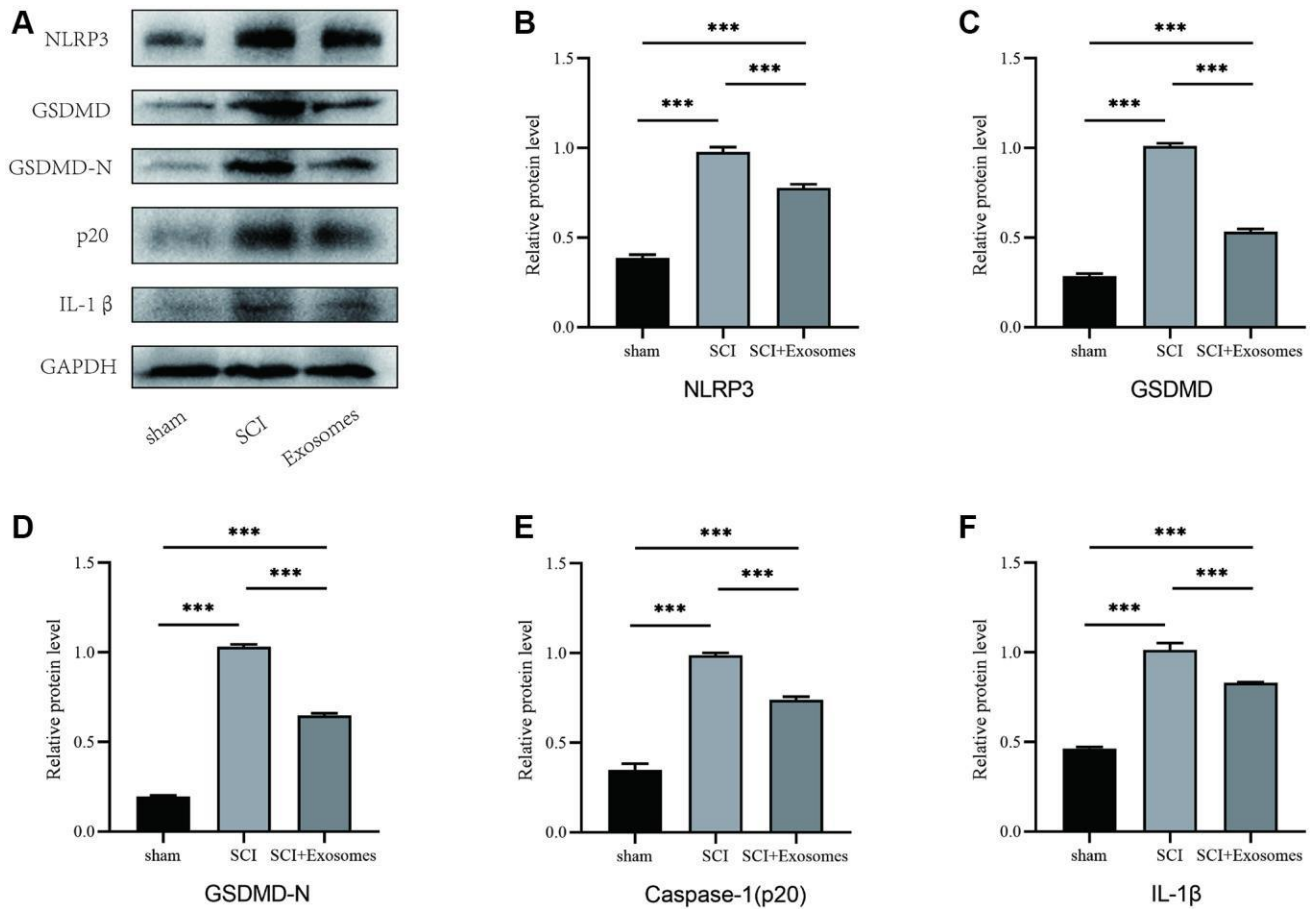

**Supplementary Figure 1.** (A–F) Western blot detection and quantitative analysis of NLRP3, GSDMD, GSDMD-N, Caspase-1 (p20), and IL-1 $\beta$  proteins in spinal cord tissue on the 7th day after injury (\* $p < 0.05$ , \*\* $p < 0.01$ , \*\*\* $p < 0.001$ ).

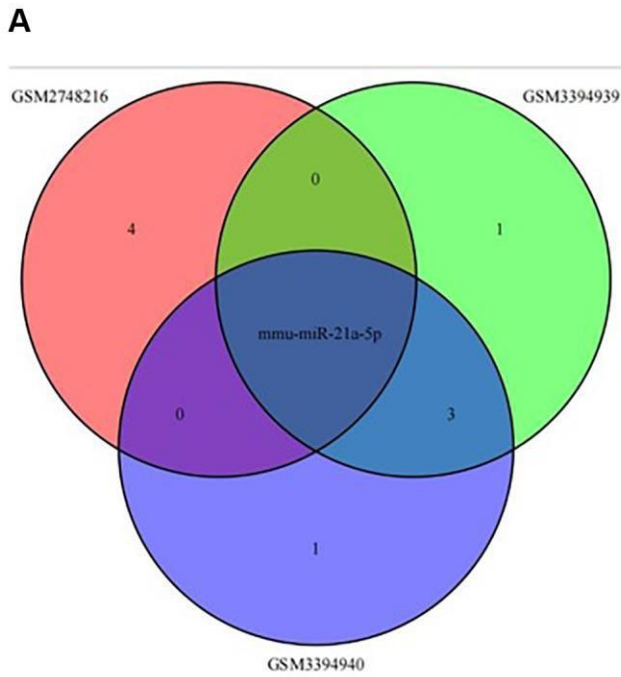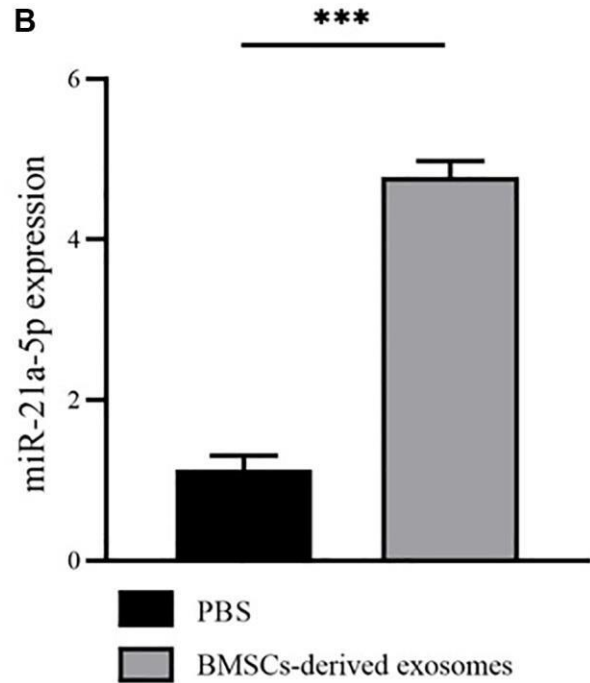

**Supplementary Figure 2.** (A) Bioinformatics analysis demonstrated miR-21a-5p is highly expressed in BMSCs-derived exosomes; (B) The result of RT-qPCR showed miR-21a-5p in BV2 cells pretreated with BMSCs-derived exosomes was significantly increased ( $*p < 0.05$ ,  $**p < 0.01$ ,  $***p < 0.001$ ).

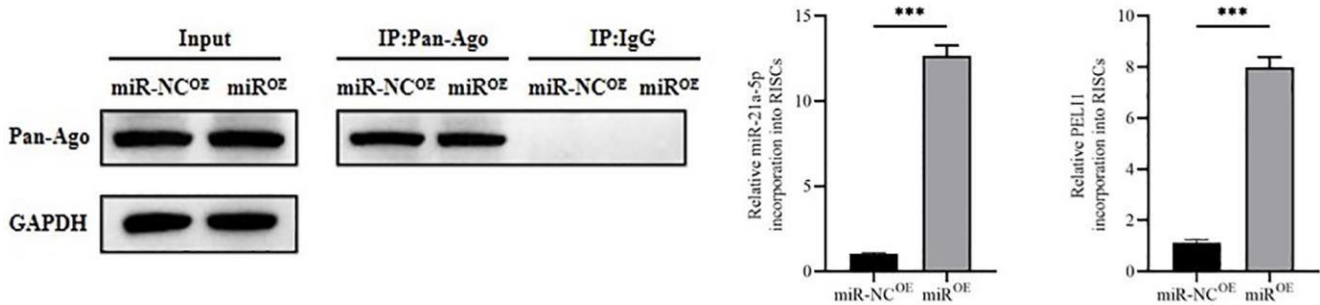

**Supplementary Figure 3.** Immunoprecipitation of the Ago2/RISC (RNA-induced silencing complex) using the Pan-Ago2 antibody in BV2 microglia overexpressing miR-NC or miR-21a-5p. IgG was used as a negative control, and GAPDH was used as an internal control ( $*p < 0.05$ ,  $**p < 0.01$ ,  $***p < 0.001$ ).
