# Supplementary material for: BMSCs-derived exosomes inhibit macrophage/microglia pyroptosis by increasing autophagy through the miR-21a-5p/PELI1 axis in spinal cord injury
Source: publisher site journal article supplement (doi:10.18632/aging.205638), 2024-03-11
Supplement: Supplementary file [file aging-v16i6-205638-supplementary-material-SD4.pdf]

## SUPPLEMENTARY FIGURES

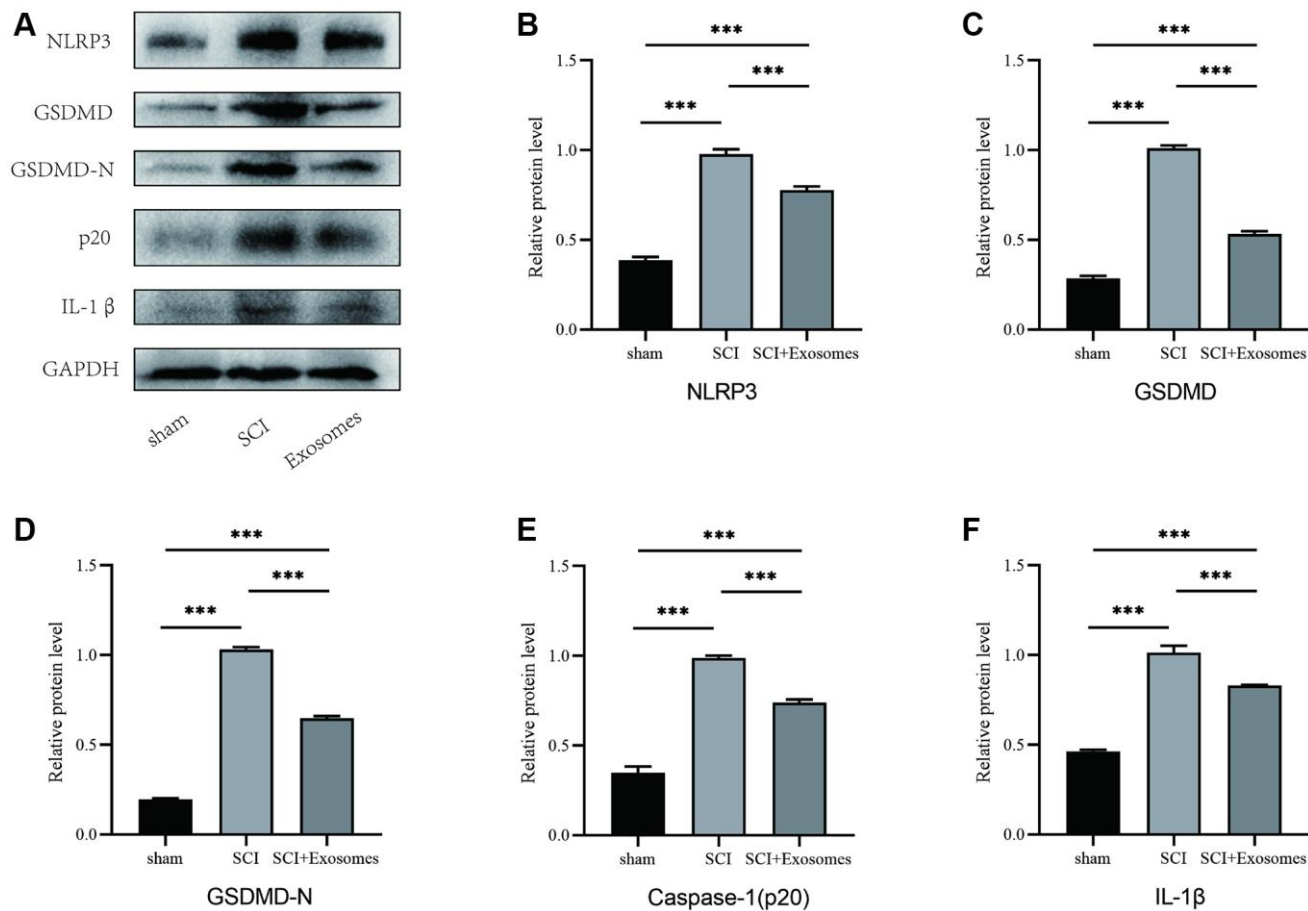

**Supplementary Figure 1.** (A–F) Western blot detection and quantitative analysis of NLRP3, GSDMD, GSDMD-N, Caspase-1(p20), and IL-1 $\beta$  proteins in spinal cord tissue on the 7th day after injury (\* $p < 0.05$ , \*\* $p < 0.01$ , \*\*\* $p < 0.001$ ).

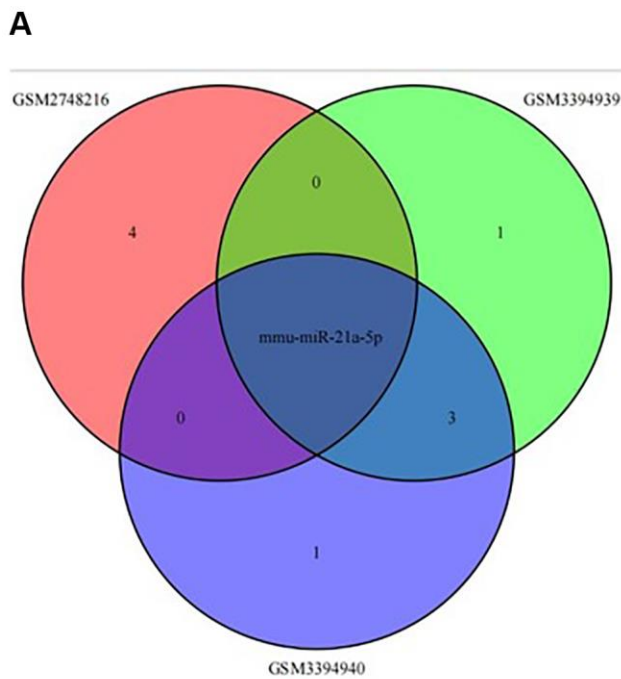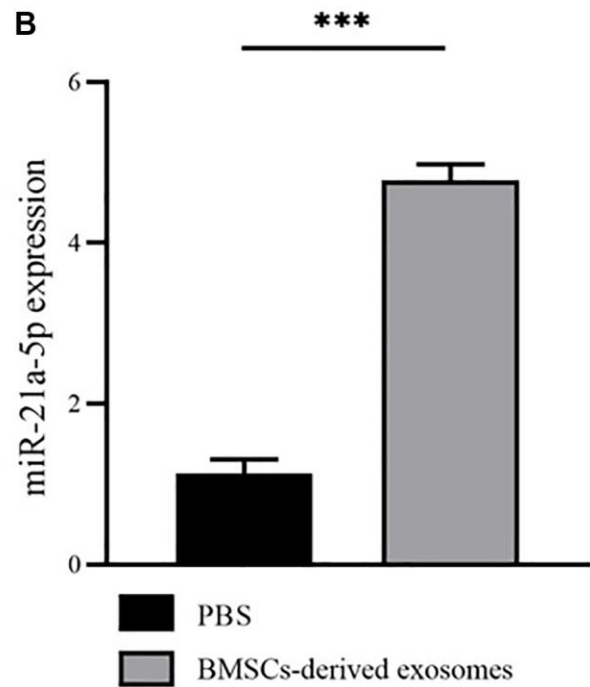

**Supplementary Figure 2.** (A) Bioinformatics analysis demonstrated miR-21a-5p is highly expressed in BMSCs- derived exosomes; (B) The result of RT-qPCR showed miR-21a-5p in BV2 cells pretreated with BMSCs-derived exosomes was significantly increased ( $*p < 0.05$ ,  $**p < 0.01$ ,  $***p < 0.001$ ).

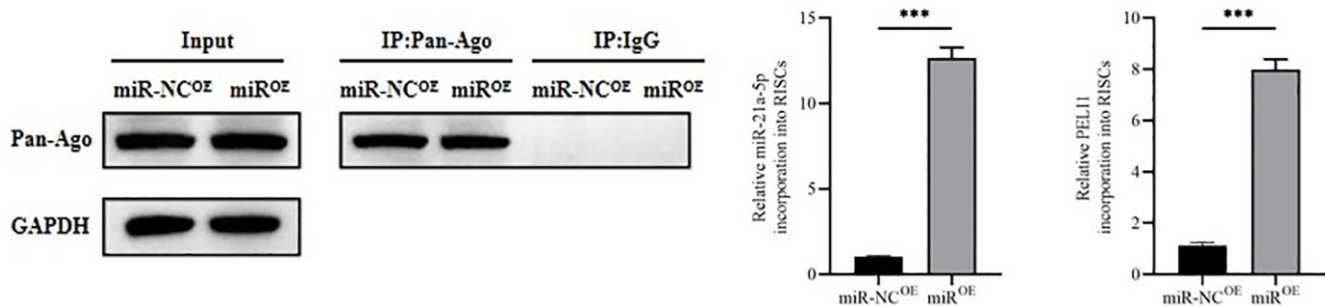

**Supplementary Figure 3.** Immunoprecipitation of the Ago2/RISC (RNA-induced silencing complex) using the Pan-Ago2 antibody in BV2 microglia overexpressing miR-NC or miR-21a-5p. IgG was used as a negative control, and GAPDH was used as an internal control ( $*p < 0.05$ ,  $**p < 0.01$ ,  $***p < 0.001$ ).

## SUPPLEMENTARY TABLE

Supplementary Table 3. The target gene list of miR-21a-5p from miRTARBASE.

---

| miRTARBASE    |
|---------------|
| Target        |
| Fas1          |
| Peli1         |
| Pdcd4         |
| Spry2         |
| Pten          |
| Reck          |
| Spry1         |
| Tgfb1         |
| Pdcd4         |
| Btg2          |
| Spry4         |
| Spry3         |
| Elavl4        |
| Pias3         |
| Tgfbr3        |
| Tnfaip812     |
| Smad7         |
| Gt(ROSA)26Sor |
| Yy1           |
| Eif4e3        |
| Pdcd10        |
| Timp3         |
| PDCD4         |
| YOD1          |
| Mmp9          |
| Kcnk6         |
| Map3k1        |
| Cyfp1         |
| Rmnd5a        |
| Tns1          |
| Gid4          |
| E2f2          |
| Rpp40         |
| Moap1         |
| AK010878      |
| Cdk6          |
| MAP2K3        |
| Il12a         |

---
