# Supplementary material for: BMSCs-derived exosomes inhibit macrophage/microglia pyroptosis by increasing autophagy through the miR-21a-5p/PELI1 axis in spinal cord injury
Source: Aging (Albany NY). 2024 Mar 11;16(6):5184–206. doi: 10.18632/aging.205638 (PMC11006467; doi:10.18632/aging.205638)
Supplement: Supplementary Table 2 [file aging-16-205638-s003.xlsx]

## Sheet: Sheet1
Supplementary Table 2. The target gene list of miR-21a-5p from miRDB.
miR-DB
Target Rank	Target Score	miRNA Name	Gene Symbol	Gene Description
1	99	mmu-miR-21a-5p	Zfp367	zinc finger protein 367
2	98	mmu-miR-21a-5p	Crebrf	CREB3 regulatory factor
3	98	mmu-miR-21a-5p	Pan3	PAN3 poly(A) specific ribonuclease subunit
4	97	mmu-miR-21a-5p	Adgrg2	adhesion G protein-coupled receptor G2
5	97	mmu-miR-21a-5p	Fasl	Fas ligand (TNF superfamily, member 6)
6	97	mmu-miR-21a-5p	Dusp8	dual specificity phosphatase 8
7	97	mmu-miR-21a-5p	Nectin3	nectin cell adhesion molecule 3
8	97	mmu-miR-21a-5p	Tgfbi	transforming growth factor, beta induced
9	96	mmu-miR-21a-5p	Spink14	serine peptidase inhibitor, Kazal type 14
10	96	mmu-miR-21a-5p	Fgf18	fibroblast growth factor 18
11	96	mmu-miR-21a-5p	Pbrm1	polybromo 1
12	95	mmu-miR-21a-5p	Tent5a	terminal nucleotidyltransferase 5A
13	94	mmu-miR-21a-5p	Peli1	pellino 1
14	94	mmu-miR-21a-5p	Pnpt1	polyribonucleotide nucleotidyltransferase 1
15	94	mmu-miR-21a-5p	Spry1	sprouty RTK signaling antagonist 1
16	94	mmu-miR-21a-5p	Il21	interleukin 21
17	94	mmu-miR-21a-5p	Ifrd1	interferon-related developmental regulator 1
18	93	mmu-miR-21a-5p	Ccl1	chemokine (C-C motif) ligand 1
19	93	mmu-miR-21a-5p	Tsga10	testis specific 10
20	93	mmu-miR-21a-5p	Armcx1	armadillo repeat containing, X-linked 1
21	93	mmu-miR-21a-5p	Ankrd49	ankyrin repeat domain 49
22	93	mmu-miR-21a-5p	Scml2	Scm polycomb group protein like 2
23	93	mmu-miR-21a-5p	Fa2h	fatty acid 2-hydroxylase
24	92	mmu-miR-21a-5p	Dmrtc2	doublesex and mab-3 related transcription factor like family C2
25	92	mmu-miR-21a-5p	Gramd3	GRAM domain containing 3
26	92	mmu-miR-21a-5p	Caskin1	CASK interacting protein 1
27	92	mmu-miR-21a-5p	Bcl7a	B cell CLL/lymphoma 7A
28	92	mmu-miR-21a-5p	Ski	ski sarcoma viral oncogene homolog (avian)
29	92	mmu-miR-21a-5p	Nkiras1	NFKB inhibitor interacting Ras-like protein 1
30	91	mmu-miR-21a-5p	Cpeb3	cytoplasmic polyadenylation element binding protein 3
31	91	mmu-miR-21a-5p	Tmem236	transmembrane protein 236
32	91	mmu-miR-21a-5p	Pcmtd2	protein-L-isoaspartate (D-aspartate) O-methyltransferase domain containing 2
33	91	mmu-miR-21a-5p	Ntf3	neurotrophin 3
34	91	mmu-miR-21a-5p	Armcx5	armadillo repeat containing, X-linked 5
35	91	mmu-miR-21a-5p	Map3k1	mitogen-activated protein kinase kinase kinase 1
36	91	mmu-miR-21a-5p	Mprip	myosin phosphatase Rho interacting protein
37	91	mmu-miR-21a-5p	Ubr3	ubiquitin protein ligase E3 component n-recognin 3
38	90	mmu-miR-21a-5p	Arhgap24	Rho GTPase activating protein 24
39	90	mmu-miR-21a-5p	Tmem170	transmembrane protein 170
40	90	mmu-miR-21a-5p	Tipin	timeless interacting protein
41	90	mmu-miR-21a-5p	Necab1	N-terminal EF-hand calcium binding protein 1
42	90	mmu-miR-21a-5p	Rmnd5a	required for meiotic nuclear division 5 homolog A
43	90	mmu-miR-21a-5p	Bcl11b	B cell leukemia/lymphoma 11B
44	90	mmu-miR-21a-5p	Ccl20	chemokine (C-C motif) ligand 20
45	89	mmu-miR-21a-5p	Kdm7a	lysine (K)-specific demethylase 7A
46	89	mmu-miR-21a-5p	Srl	sarcalumenin
47	89	mmu-miR-21a-5p	Ranbp3l	RAN binding protein 3-like
48	89	mmu-miR-21a-5p	Hnrnpk	heterogeneous nuclear ribonucleoprotein K
49	89	mmu-miR-21a-5p	Il12a	interleukin 12a
50	89	mmu-miR-21a-5p	Acvr2a	activin receptor IIA
51	89	mmu-miR-21a-5p	Zdhhc17	zinc finger, DHHC domain containing 17
52	89	mmu-miR-21a-5p	Yod1	YOD1 deubiquitinase
53	88	mmu-miR-21a-5p	Edrf1	erythroid differentiation regulatory factor 1
54	88	mmu-miR-21a-5p	Dvl2	dishevelled segment polarity protein 2
55	88	mmu-miR-21a-5p	Zfp27	zinc finger protein 27
56	88	mmu-miR-21a-5p	Tmtc3	transmembrane and tetratricopeptide repeat containing 3
57	88	mmu-miR-21a-5p	Ppp1r3b	protein phosphatase 1, regulatory subunit 3B
58	88	mmu-miR-21a-5p	Spry2	sprouty RTK signaling antagonist 2
59	87	mmu-miR-21a-5p	Glis2	GLIS family zinc finger 2
60	87	mmu-miR-21a-5p	Lsm5	LSM5 homolog, U6 small nuclear RNA and mRNA degradation associated
61	87	mmu-miR-21a-5p	Epha4	Eph receptor A4
62	87	mmu-miR-21a-5p	Mreg	melanoregulin
63	87	mmu-miR-21a-5p	Sox5	SRY (sex determining region Y)-box 5
64	87	mmu-miR-21a-5p	Jph1	junctophilin 1
65	87	mmu-miR-21a-5p	Edil3	EGF-like repeats and discoidin I-like domains 3
66	87	mmu-miR-21a-5p	Ndufv2	NADH:ubiquinone oxidoreductase core subunit V2
67	87	mmu-miR-21a-5p	Acsm2	acyl-CoA synthetase medium-chain family member 2
68	87	mmu-miR-21a-5p	Rbms3	RNA binding motif, single stranded interacting protein
69	87	mmu-miR-21a-5p	Akap6	A kinase (PRKA) anchor protein 6
70	87	mmu-miR-21a-5p	Matn2	matrilin 2
71	87	mmu-miR-21a-5p	Yap1	yes-associated protein 1
72	86	mmu-miR-21a-5p	Ipo11	importin 11
73	86	mmu-miR-21a-5p	Pja2	praja ring finger ubiquitin ligase 2
74	86	mmu-miR-21a-5p	Nfia	nuclear factor I/A
75	86	mmu-miR-21a-5p	Map2k3	mitogen-activated protein kinase kinase 3
76	86	mmu-miR-21a-5p	Fgd4	FYVE, RhoGEF and PH domain containing 4
77	86	mmu-miR-21a-5p	Hnrnpu	heterogeneous nuclear ribonucleoprotein U
78	86	mmu-miR-21a-5p	Fmn1	formin 1
79	86	mmu-miR-21a-5p	B3galt1	UDP-Gal:betaGlcNAc beta 1,3-galactosyltransferase, polypeptide 1
80	86	mmu-miR-21a-5p	Mbd4	methyl-CpG binding domain protein 4
81	86	mmu-miR-21a-5p	Gm4894	predicted gene 4894
82	86	mmu-miR-21a-5p	Ppp1r3a	protein phosphatase 1, regulatory subunit 3A
83	85	mmu-miR-21a-5p	Glcci1	glucocorticoid induced transcript 1
84	85	mmu-miR-21a-5p	Zfp229	zinc finger protein 229
85	85	mmu-miR-21a-5p	Cwh43	cell wall biogenesis 43 C-terminal homolog
86	85	mmu-miR-21a-5p	Stag2	stromal antigen 2
87	85	mmu-miR-21a-5p	Mindy2	MINDY lysine 48 deubiquitinase 2
88	84	mmu-miR-21a-5p	Sc5d	sterol-C5-desaturase
89	84	mmu-miR-21a-5p	Pcsk6	proprotein convertase subtilisin/kexin type 6
90	84	mmu-miR-21a-5p	Smad7	SMAD family member 7
91	84	mmu-miR-21a-5p	Fnip1	folliculin interacting protein 1
92	84	mmu-miR-21a-5p	Rasgrp1	RAS guanyl releasing protein 1
93	84	mmu-miR-21a-5p	Elf2	E74-like factor 2
94	84	mmu-miR-21a-5p	Slc30a10	solute carrier family 30, member 10
95	83	mmu-miR-21a-5p	Ank2	ankyrin 2, brain
96	83	mmu-miR-21a-5p	Frat1	frequently rearranged in advanced T cell lymphomas
97	83	mmu-miR-21a-5p	Ehd1	EH-domain containing 1
98	83	mmu-miR-21a-5p	Btg2	B cell translocation gene 2, anti-proliferative
99	83	mmu-miR-21a-5p	Prkci	protein kinase C, iota
100	83	mmu-miR-21a-5p	Hipk3	homeodomain interacting protein kinase 3
101	83	mmu-miR-21a-5p	Pdcd4	programmed cell death 4
102	83	mmu-miR-21a-5p	Osr1	odd-skipped related transcription factor 1
103	82	mmu-miR-21a-5p	Ube2d3	ubiquitin-conjugating enzyme E2D 3
104	82	mmu-miR-21a-5p	Reck	reversion-inducing-cysteine-rich protein with kazal motifs
105	82	mmu-miR-21a-5p	Plxna2	plexin A2
106	82	mmu-miR-21a-5p	Fsd1l	fibronectin type III and SPRY domain containing 1-like
107	82	mmu-miR-21a-5p	Pik3r1	phosphoinositide-3-kinase regulatory subunit 1
108	82	mmu-miR-21a-5p	Zfp955b	zinc finger protein 955B
109	82	mmu-miR-21a-5p	Pitx2	paired-like homeodomain transcription factor 2
110	81	mmu-miR-21a-5p	Ndnf	neuron-derived neurotrophic factor
111	81	mmu-miR-21a-5p	Rab11a	RAB11A, member RAS oncogene family
112	81	mmu-miR-21a-5p	Dlgap1	DLG associated protein 1
113	81	mmu-miR-21a-5p	Rsad2	radical S-adenosyl methionine domain containing 2
114	81	mmu-miR-21a-5p	Vcl	vinculin
115	80	mmu-miR-21a-5p	Jag1	jagged 1
116	80	mmu-miR-21a-5p	Proser2	proline and serine rich 2
117	80	mmu-miR-21a-5p	Tmem17	transmembrane protein 17
118	80	mmu-miR-21a-5p	Ms4a1	membrane-spanning 4-domains, subfamily A, member 1
119	80	mmu-miR-21a-5p	Pcbp2	poly(rC) binding protein 2
120	80	mmu-miR-21a-5p	Nfib	nuclear factor I/B
121	80	mmu-miR-21a-5p	Sema5a	sema domain, seven thrombospondin repeats (type 1 and type 1-like), transmembrane domain (TM) and short cytoplasmic domain, (semaphorin) 5A
122	79	mmu-miR-21a-5p	Cstf3	cleavage stimulation factor, 3' pre-RNA, subunit 3
123	79	mmu-miR-21a-5p	Trim52	tripartite motif-containing 52
124	79	mmu-miR-21a-5p	Pcm1	pericentriolar material 1
125	79	mmu-miR-21a-5p	Trappc8	trafficking protein particle complex 8
126	79	mmu-miR-21a-5p	Slc29a3	solute carrier family 29 (nucleoside transporters), member 3
127	79	mmu-miR-21a-5p	Abraxas1	BRCA1 A complex subunit
128	79	mmu-miR-21a-5p	Asb1	ankyrin repeat and SOCS box-containing 1
129	79	mmu-miR-21a-5p	Ring1	ring finger protein 1
130	78	mmu-miR-21a-5p	Adtrp	androgen dependent TFPI regulating protein
131	78	mmu-miR-21a-5p	Pcbp1	poly(rC) binding protein 1
132	78	mmu-miR-21a-5p	Mblac2	metallo-beta-lactamase domain containing 2
133	78	mmu-miR-21a-5p	Thrb	thyroid hormone receptor beta
134	78	mmu-miR-21a-5p	Mtmr12	myotubularin related protein 12
135	78	mmu-miR-21a-5p	Adnp	activity-dependent neuroprotective protein
136	78	mmu-miR-21a-5p	Bnc2	basonuclin 2
137	77	mmu-miR-21a-5p	Tssk2	testis-specific serine kinase 2
138	77	mmu-miR-21a-5p	Tnrc6b	trinucleotide repeat containing 6b
139	77	mmu-miR-21a-5p	Rasa1	RAS p21 protein activator 1
140	77	mmu-miR-21a-5p	Tagap	T cell activation Rho GTPase activating protein
141	77	mmu-miR-21a-5p	Mybl1	myeloblastosis oncogene-like 1
142	77	mmu-miR-21a-5p	Wdr78	WD repeat domain 78
143	77	mmu-miR-21a-5p	Rnf2	ring finger protein 2
144	76	mmu-miR-21a-5p	Ccl22	chemokine (C-C motif) ligand 22
145	76	mmu-miR-21a-5p	Zbtb41	zinc finger and BTB domain containing 41
146	76	mmu-miR-21a-5p	Rspo3	R-spondin 3
147	76	mmu-miR-21a-5p	Il33	interleukin 33
148	76	mmu-miR-21a-5p	Klf6	Kruppel-like factor 6
149	75	mmu-miR-21a-5p	Slc9a6	solute carrier family 9 (sodium/hydrogen exchanger), member 6
150	75	mmu-miR-21a-5p	Skp2	S-phase kinase-associated protein 2 (p45)
151	75	mmu-miR-21a-5p	Sgms2	sphingomyelin synthase 2
152	75	mmu-miR-21a-5p	Fbxo28	F-box protein 28
153	75	mmu-miR-21a-5p	Lrrcc1	leucine rich repeat and coiled-coil domain containing 1
154	74	mmu-miR-21a-5p	Itgav	integrin alpha V
155	74	mmu-miR-21a-5p	Brd2	bromodomain containing 2
156	74	mmu-miR-21a-5p	Ganc	glucosidase, alpha; neutral C
157	73	mmu-miR-21a-5p	Gtf2e2	general transcription factor II E, polypeptide 2 (beta subunit)
158	73	mmu-miR-21a-5p	Pom121	nuclear pore membrane protein 121
159	73	mmu-miR-21a-5p	Mynn	myoneurin
160	73	mmu-miR-21a-5p	Arhgap31	Rho GTPase activating protein 31
161	73	mmu-miR-21a-5p	Ubl4a	ubiquitin-like 4A
162	73	mmu-miR-21a-5p	Ing3	inhibitor of growth family, member 3
163	73	mmu-miR-21a-5p	Plekha1	pleckstrin homology domain containing, family A (phosphoinositide binding specific) member 1
164	73	mmu-miR-21a-5p	Agtr1b	angiotensin II receptor, type 1b
165	73	mmu-miR-21a-5p	Klf12	Kruppel-like factor 12
166	73	mmu-miR-21a-5p	Pde6a	phosphodiesterase 6A, cGMP-specific, rod, alpha
167	72	mmu-miR-21a-5p	Ostn	osteocrin
168	72	mmu-miR-21a-5p	Hmgn2	high mobility group nucleosomal binding domain 2
169	72	mmu-miR-21a-5p	Mbnl3	muscleblind like splicing factor 3
170	71	mmu-miR-21a-5p	Zfp704	zinc finger protein 704
171	71	mmu-miR-21a-5p	Olfr1426	olfactory receptor 1426
172	71	mmu-miR-21a-5p	Fbxo11	F-box protein 11
173	71	mmu-miR-21a-5p	Zfp110	zinc finger protein 110
174	71	mmu-miR-21a-5p	Gm3985	predicted gene 3985
175	71	mmu-miR-21a-5p	Mbnl1	muscleblind like splicing factor 1
176	70	mmu-miR-21a-5p	Alx1	ALX homeobox 1
177	70	mmu-miR-21a-5p	Slit2	slit guidance ligand 2
178	70	mmu-miR-21a-5p	Smpd4	sphingomyelin phosphodiesterase 4
179	70	mmu-miR-21a-5p	Dclk1	doublecortin-like kinase 1
180	69	mmu-miR-21a-5p	Mapre1	microtubule-associated protein, RP/EB family, member 1
181	69	mmu-miR-21a-5p	Hspa14	heat shock protein 14
182	69	mmu-miR-21a-5p	Wwp1	WW domain containing E3 ubiquitin protein ligase 1
183	69	mmu-miR-21a-5p	Csrnp3	cysteine-serine-rich nuclear protein 3
184	69	mmu-miR-21a-5p	Tnfaip3	tumor necrosis factor, alpha-induced protein 3
185	69	mmu-miR-21a-5p	Trmt10a	tRNA methyltransferase 10A
186	69	mmu-miR-21a-5p	Scnn1g	sodium channel, nonvoltage-gated 1 gamma
187	69	mmu-miR-21a-5p	Casc4	cancer susceptibility candidate 4
188	68	mmu-miR-21a-5p	Fmo2	flavin containing monooxygenase 2
189	68	mmu-miR-21a-5p	Hnrnpa3	heterogeneous nuclear ribonucleoprotein A3
190	68	mmu-miR-21a-5p	Ralgps2	Ral GEF with PH domain and SH3 binding motif 2
191	68	mmu-miR-21a-5p	ccdc198	coiled-coil domain containing 198
192	68	mmu-miR-21a-5p	1190002N15Rik	RIKEN cDNA 1190002N15 gene
193	68	mmu-miR-21a-5p	Plag1	pleiomorphic adenoma gene 1
194	68	mmu-miR-21a-5p	Adk	adenosine kinase
195	68	mmu-miR-21a-5p	Ppara	peroxisome proliferator activated receptor alpha
196	68	mmu-miR-21a-5p	Zfp882	zinc finger protein 882
197	68	mmu-miR-21a-5p	Fam161b	family with sequence similarity 161, member B
198	68	mmu-miR-21a-5p	Nr4a1	nuclear receptor subfamily 4, group A, member 1
199	68	mmu-miR-21a-5p	Xkr6	X-linked Kx blood group related 6
200	68	mmu-miR-21a-5p	Sos2	SOS Ras/Rho guanine nucleotide exchange factor 2
201	68	mmu-miR-21a-5p	Sgcb	sarcoglycan, beta (dystrophin-associated glycoprotein)
202	67	mmu-miR-21a-5p	Slc35a5	solute carrier family 35, member A5
203	67	mmu-miR-21a-5p	Scrn1	secernin 1
204	67	mmu-miR-21a-5p	Dnaja1	DnaJ heat shock protein family (Hsp40) member A1
205	67	mmu-miR-21a-5p	Tiam1	T cell lymphoma invasion and metastasis 1
206	67	mmu-miR-21a-5p	Six5	sine oculis-related homeobox 5
207	67	mmu-miR-21a-5p	Epm2aip1	EPM2A (laforin) interacting protein 1
208	67	mmu-miR-21a-5p	Msx1	msh homeobox 1
209	67	mmu-miR-21a-5p	Slamf7	SLAM family member 7
210	67	mmu-miR-21a-5p	Cnr1	cannabinoid receptor 1 (brain)
211	67	mmu-miR-21a-5p	Map3k7	mitogen-activated protein kinase kinase kinase 7
212	67	mmu-miR-21a-5p	Epyc	epiphycan
213	66	mmu-miR-21a-5p	Bahd1	bromo adjacent homology domain containing 1
214	66	mmu-miR-21a-5p	Aspn	asporin
215	66	mmu-miR-21a-5p	Rsl1	regulator of sex limited protein 1
216	66	mmu-miR-21a-5p	Wdr76	WD repeat domain 76
217	66	mmu-miR-21a-5p	Zcchc24	zinc finger, CCHC domain containing 24
218	66	mmu-miR-21a-5p	Timp3	tissue inhibitor of metalloproteinase 3
219	66	mmu-miR-21a-5p	Gm1110	predicted gene 1110
220	66	mmu-miR-21a-5p	Zswim6	zinc finger SWIM-type containing 6
221	66	mmu-miR-21a-5p	Nfatc3	nuclear factor of activated T cells, cytoplasmic, calcineurin dependent 3
222	66	mmu-miR-21a-5p	Pnrc2	proline-rich nuclear receptor coactivator 2
223	65	mmu-miR-21a-5p	Skint7	selection and upkeep of intraepithelial T cells 7
224	64	mmu-miR-21a-5p	Tagap1	T cell activation GTPase activating protein 1
225	64	mmu-miR-21a-5p	Tesk2	testis-specific kinase 2
226	64	mmu-miR-21a-5p	Acvr1c	activin A receptor, type IC
227	64	mmu-miR-21a-5p	Magee2	melanoma antigen, family E, 2
228	64	mmu-miR-21a-5p	Trim33	tripartite motif-containing 33
229	64	mmu-miR-21a-5p	Ispd	isoprenoid synthase domain containing
230	64	mmu-miR-21a-5p	Kcnv1	potassium channel, subfamily V, member 1
231	64	mmu-miR-21a-5p	Klhl42	kelch-like 42
232	64	mmu-miR-21a-5p	St6galnac3	ST6 (alpha-N-acetyl-neuraminyl-2,3-beta-galactosyl-1,3)-N-acetylgalactosaminide alpha-2,6-sialyltransferase 3
233	63	mmu-miR-21a-5p	Nkain2	Na+/K+ transporting ATPase interacting 2
234	63	mmu-miR-21a-5p	Lipk	lipase, family member K
235	63	mmu-miR-21a-5p	Col12a1	collagen, type XII, alpha 1
236	63	mmu-miR-21a-5p	Omd	osteomodulin
237	63	mmu-miR-21a-5p	Acat1	acetyl-Coenzyme A acetyltransferase 1
238	63	mmu-miR-21a-5p	Herc6	hect domain and RLD 6
239	63	mmu-miR-21a-5p	Pdcl3	phosducin-like 3
240	62	mmu-miR-21a-5p	Taf7	TATA-box binding protein associated factor 7
241	62	mmu-miR-21a-5p	Cnot6l	CCR4-NOT transcription complex, subunit 6-like
242	62	mmu-miR-21a-5p	Arl4a	ADP-ribosylation factor-like 4A
243	62	mmu-miR-21a-5p	Nt5e	5' nucleotidase, ecto
244	62	mmu-miR-21a-5p	Ndufaf4	NADH:ubiquinone oxidoreductase complex assembly factor 4
245	62	mmu-miR-21a-5p	Hpgd	hydroxyprostaglandin dehydrogenase 15 (NAD)
246	62	mmu-miR-21a-5p	Cdc25a	cell division cycle 25A
247	62	mmu-miR-21a-5p	Mef2c	myocyte enhancer factor 2C
248	62	mmu-miR-21a-5p	Pdhx	pyruvate dehydrogenase complex, component X
249	62	mmu-miR-21a-5p	Tmem29	transmembrane protein 29
250	62	mmu-miR-21a-5p	Esyt2	extended synaptotagmin-like protein 2
251	62	mmu-miR-21a-5p	Upk1b	uroplakin 1B
252	62	mmu-miR-21a-5p	Il2ra	interleukin 2 receptor, alpha chain
253	61	mmu-miR-21a-5p	Eif2a	eukaryotic translation initiation factor 2A
254	61	mmu-miR-21a-5p	Ptpn21	protein tyrosine phosphatase, non-receptor type 21
255	61	mmu-miR-21a-5p	Kalrn	kalirin, RhoGEF kinase
256	61	mmu-miR-21a-5p	Gid4	GID complex subunit 4, VID24 homolog
257	61	mmu-miR-21a-5p	Reg3b	regenerating islet-derived 3 beta
258	61	mmu-miR-21a-5p	Stat3	signal transducer and activator of transcription 3
259	61	mmu-miR-21a-5p	F5	coagulation factor V
260	60	mmu-miR-21a-5p	Akirin1	akirin 1
261	60	mmu-miR-21a-5p	Pfkm	phosphofructokinase, muscle
262	60	mmu-miR-21a-5p	Arl2bp	ADP-ribosylation factor-like 2 binding protein
263	60	mmu-miR-21a-5p	Cadm2	cell adhesion molecule 2
264	60	mmu-miR-21a-5p	Mzf1	myeloid zinc finger 1
265	60	mmu-miR-21a-5p	Zfp36l2	zinc finger protein 36, C3H type-like 2
266	60	mmu-miR-21a-5p	Hs3st1	heparan sulfate (glucosamine) 3-O-sulfotransferase 1
267	60	mmu-miR-21a-5p	Slc25a46	solute carrier family 25, member 46
268	60	mmu-miR-21a-5p	Tmem229a	transmembrane protein 229A
269	59	mmu-miR-21a-5p	Nedd4	neural precursor cell expressed, developmentally down-regulated 4
270	59	mmu-miR-21a-5p	Kbtbd7	kelch repeat and BTB (POZ) domain containing 7
271	59	mmu-miR-21a-5p	Bcl11a	B cell CLL/lymphoma 11A (zinc finger protein)
272	59	mmu-miR-21a-5p	Tmtc1	transmembrane and tetratricopeptide repeat containing 1
273	59	mmu-miR-21a-5p	Sez6l	seizure related 6 homolog like
274	59	mmu-miR-21a-5p	Svep1	sushi, von Willebrand factor type A, EGF and pentraxin domain containing 1
275	59	mmu-miR-21a-5p	Stk40	serine/threonine kinase 40
276	59	mmu-miR-21a-5p	Per2	period circadian clock 2
277	59	mmu-miR-21a-5p	Rgcc	regulator of cell cycle
278	59	mmu-miR-21a-5p	Slc7a6	solute carrier family 7 (cationic amino acid transporter, y+ system), member 6
279	58	mmu-miR-21a-5p	Dmrtc1a	DMRT-like family C1a
280	58	mmu-miR-21a-5p	Atrn	attractin
281	58	mmu-miR-21a-5p	Mrgprb1	MAS-related GPR, member B1
282	58	mmu-miR-21a-5p	Apol6	apolipoprotein L 6
283	58	mmu-miR-21a-5p	Ccdc47	coiled-coil domain containing 47
284	58	mmu-miR-21a-5p	Tirap	toll-interleukin 1 receptor (TIR) domain-containing adaptor protein
285	58	mmu-miR-21a-5p	Tshz1	teashirt zinc finger family member 1
286	58	mmu-miR-21a-5p	T2	brachyury 2
287	58	mmu-miR-21a-5p	Cxcl10	chemokine (C-X-C motif) ligand 10
288	58	mmu-miR-21a-5p	Pspc1	paraspeckle protein 1
289	58	mmu-miR-21a-5p	Chic1	cysteine-rich hydrophobic domain 1
290	57	mmu-miR-21a-5p	Tmem42	transmembrane protein 42
291	57	mmu-miR-21a-5p	Lrrc55	leucine rich repeat containing 55
292	57	mmu-miR-21a-5p	Wfdc16	WAP four-disulfide core domain 16
293	57	mmu-miR-21a-5p	Relch	RAB11 binding and LisH domain, coiled-coil and HEAT repeat containing
294	57	mmu-miR-21a-5p	Zfp619	zinc finger protein 619
295	57	mmu-miR-21a-5p	Serpina7	serine (or cysteine) peptidase inhibitor, clade A (alpha-1 antiproteinase, antitrypsin), member 7
296	57	mmu-miR-21a-5p	E2f3	E2F transcription factor 3
297	57	mmu-miR-21a-5p	Nus1	NUS1 dehydrodolichyl diphosphate synthase subunit
298	57	mmu-miR-21a-5p	Slc6a1	solute carrier family 6 (neurotransmitter transporter, GABA), member 1
299	57	mmu-miR-21a-5p	Dkk2	dickkopf WNT signaling pathway inhibitor 2
300	57	mmu-miR-21a-5p	Trappc2	trafficking protein particle complex 2
301	56	mmu-miR-21a-5p	Ints2	integrator complex subunit 2
302	56	mmu-miR-21a-5p	Stam	signal transducing adaptor molecule (SH3 domain and ITAM motif) 1
303	56	mmu-miR-21a-5p	Neb	nebulin
304	56	mmu-miR-21a-5p	Wdr44	WD repeat domain 44
305	56	mmu-miR-21a-5p	Nrp	neural regeneration protein
306	55	mmu-miR-21a-5p	Rreb1	ras responsive element binding protein 1
307	55	mmu-miR-21a-5p	Cpne4	copine IV
308	55	mmu-miR-21a-5p	Larp4	La ribonucleoprotein domain family, member 4
309	55	mmu-miR-21a-5p	Saxo2	stabilizer of axonemal microtubules 2
310	54	mmu-miR-21a-5p	Adgra1	adhesion G protein-coupled receptor A1
311	54	mmu-miR-21a-5p	Cacng5	calcium channel, voltage-dependent, gamma subunit 5
312	54	mmu-miR-21a-5p	Adgra3	adhesion G protein-coupled receptor A3
313	54	mmu-miR-21a-5p	Fcrl5	Fc receptor-like 5
314	54	mmu-miR-21a-5p	Zfp811	zinc finger protein 811
315	54	mmu-miR-21a-5p	Sox6	SRY (sex determining region Y)-box 6
316	54	mmu-miR-21a-5p	Zcchc3	zinc finger, CCHC domain containing 3
317	54	mmu-miR-21a-5p	Tacr1	tachykinin receptor 1
318	54	mmu-miR-21a-5p	Hsd17b14	hydroxysteroid (17-beta) dehydrogenase 14
319	53	mmu-miR-21a-5p	Stc1	stanniocalcin 1
320	53	mmu-miR-21a-5p	Ptcd3	pentatricopeptide repeat domain 3
321	53	mmu-miR-21a-5p	Taf5	TATA-box binding protein associated factor 5
322	53	mmu-miR-21a-5p	Rab11fip1	RAB11 family interacting protein 1 (class I)
323	53	mmu-miR-21a-5p	Psrc1	proline/serine-rich coiled-coil 1
324	53	mmu-miR-21a-5p	Arhgap32	Rho GTPase activating protein 32
325	53	mmu-miR-21a-5p	Hbp1	high mobility group box transcription factor 1
326	53	mmu-miR-21a-5p	St8sia6	ST8 alpha-N-acetyl-neuraminide alpha-2,8-sialyltransferase 6
327	53	mmu-miR-21a-5p	Cbx4	chromobox 4
328	53	mmu-miR-21a-5p	Lin28b	lin-28 homolog B (C. elegans)
329	52	mmu-miR-21a-5p	Pex12	peroxisomal biogenesis factor 12
330	52	mmu-miR-21a-5p	Ror1	receptor tyrosine kinase-like orphan receptor 1
331	52	mmu-miR-21a-5p	Galnt12	polypeptide N-acetylgalactosaminyltransferase 12
332	52	mmu-miR-21a-5p	Gpr88	G-protein coupled receptor 88
333	52	mmu-miR-21a-5p	Nfat5	nuclear factor of activated T cells 5
334	52	mmu-miR-21a-5p	Rabgap1l	RAB GTPase activating protein 1-like
335	52	mmu-miR-21a-5p	Rnf167	ring finger protein 167
336	52	mmu-miR-21a-5p	Sema4a	sema domain, immunoglobulin domain (Ig), transmembrane domain (TM) and short cytoplasmic domain, (semaphorin) 4A
337	52	mmu-miR-21a-5p	Peg12	paternally expressed 12
338	52	mmu-miR-21a-5p	Agps	alkylglycerone phosphate synthase
339	51	mmu-miR-21a-5p	Acbd5	acyl-Coenzyme A binding domain containing 5
340	51	mmu-miR-21a-5p	Fstl5	follistatin-like 5
341	51	mmu-miR-21a-5p	Kcnq5	potassium voltage-gated channel, subfamily Q, member 5
342	51	mmu-miR-21a-5p	Slc25a36	solute carrier family 25, member 36
343	51	mmu-miR-21a-5p	Zcchc8	zinc finger, CCHC domain containing 8
344	51	mmu-miR-21a-5p	Bhlhe40	basic helix-loop-helix family, member e40
345	51	mmu-miR-21a-5p	Dio3	deiodinase, iodothyronine type III
346	51	mmu-miR-21a-5p	Pdha1	pyruvate dehydrogenase E1 alpha 1
347	50	mmu-miR-21a-5p	Cnpy1	canopy FGF signaling regulator 1
348	50	mmu-miR-21a-5p	Nexmif	neurite extension and migration factor
349	50	mmu-miR-21a-5p	Spata9	spermatogenesis associated 9
350	50	mmu-miR-21a-5p	Smarcd1	SWI/SNF related, matrix associated, actin dependent regulator of chromatin, subfamily d, member 1
351	50	mmu-miR-21a-5p	Eml6	echinoderm microtubule associated protein like 6
